# Supplementary material
Source: Springer Nature journal article supplement (https://www.springermedizin.de/resource/supplementary/12887_2014_1081_MOESM1_ESM.pdf/9476460)
Supplement: MOESM1 [file 9476460]

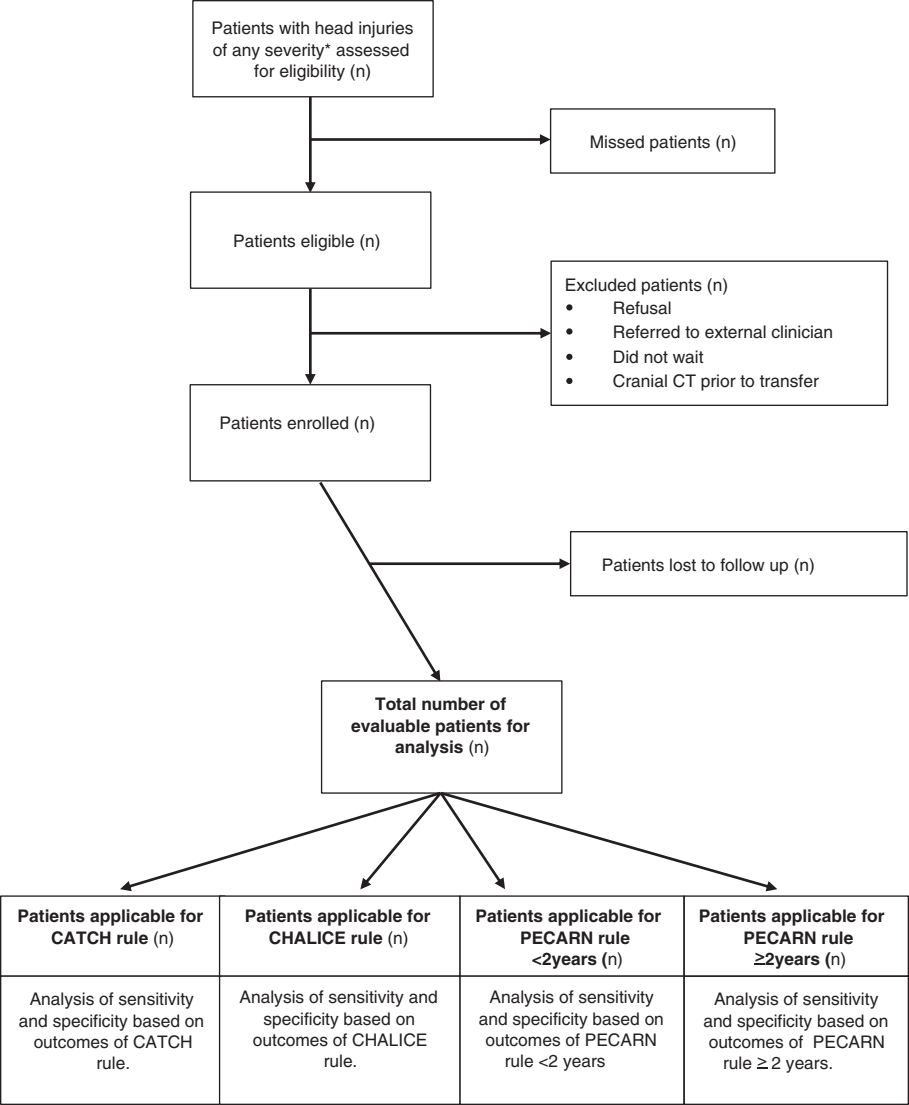

Patients with head injuries of any severity\* assessed for eligibility (n)

Missed patients (n)

Patients eligible (n)

Excluded patients (n)

- Refusal
- Referred to external clinician
- Did not wait
- Cranial CT prior to transfer

Patients enrolled (n)

Patients lost to follow up (n)

**Total number of evaluable patients for analysis (n)**

| Patients applicable for CATCH rule (n)                                   | Patients applicable for CHALICE rule (n)                                   | Patients applicable for PECARN rule <2years (n)                                   | Patients applicable for PECARN rule ≥2years (n)                                     |
|--------------------------------------------------------------------------|----------------------------------------------------------------------------|-----------------------------------------------------------------------------------|-------------------------------------------------------------------------------------|
| Analysis of sensitivity and specificity based on outcomes of CATCH rule. | Analysis of sensitivity and specificity based on outcomes of CHALICE rule. | Analysis of sensitivity and specificity based on outcomes of PECARN rule <2 years | Analysis of sensitivity and specificity based on outcomes of PECARN rule ≥ 2 years. |
